# Supplementary material for: Anti-sintering Au nanoparticles stabilized by a Fe-incorporated MgAl2O4 spinel for CO oxidation
Source: Royal Society of Chemistry journal article supplement (doi:10.1039/d0cy02208j), 2020-12-16
Supplement: d0cy02208j1.pdf [file d0cy02208j1.pdf]

Supporting Information

## Anti-sintering Au Nanoparticles Stabilized by Fe Incorporated $\text{MgAl}_2\text{O}_4$ Spinel for CO Oxidation

Palle Ramana Murthy \*, Jing-Cai Zhang, Wei-Zhen Li

CAS Key Laboratory of Science and Technology on Applied Catalysis, Dalian Institute of Chemical  
Physics, Chinese Academy of Sciences, Dalian 116023, China.

\* Corresponding authors: [ramanapalle1@gmail.com](mailto:ramanapalle1@gmail.com)

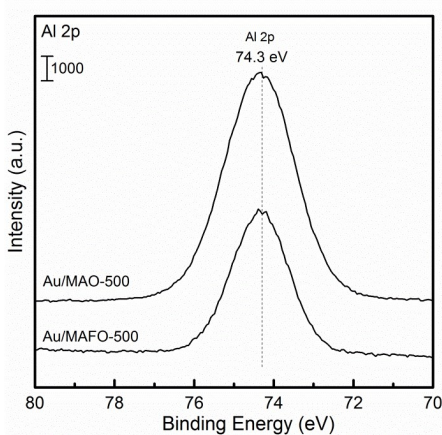

Figure S1. XPS spectra of Al 2p

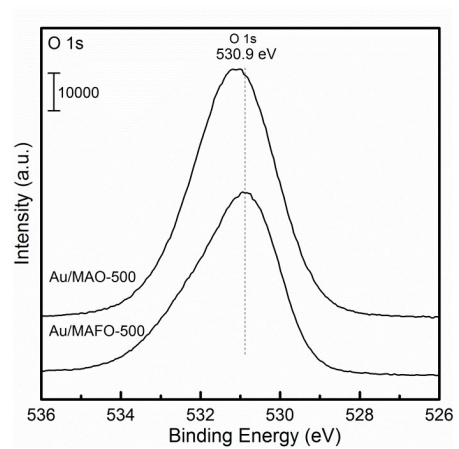

Figure S2. XPS spectra of O 1s
